# Supplementary material for: Probing site-selective doping and charge compensating defects in KMgF3: insights from a hybrid DFT study
Source: Royal Society of Chemistry journal article supplement (doi:10.1039/d3cp03966h), 2023-01-01
Supplement: d3cp03966h1.pdf [file d3cp03966h1.pdf]

**Electronic Supporting Information**

**Probing the Site-Selective Doping and Charge Compensating Defects in  
KMgF<sub>3</sub>: Insights from a Hybrid DFT Study**

Pampa Modak<sup>1,2</sup> Brindaban Modak\*,<sup>2,3</sup> A. Arya\*\*<sup>2,4</sup>

<sup>1</sup>RSD, Atomic Energy Regulatory Board, <sup>2</sup>Homi Bhabha National Institute, Mumbai 400 094

<sup>3</sup>Theoretical Chemistry Section, Chemistry Division, Bhabha Atomic Research Centre, Mumbai  
400 085, India

<sup>4</sup>Glass & Advanced Materials Division, Bhabha Atomic Research Centre,  
Mumbai 400 085

\*Email: bmodak@barc.gov.in

\*\*Email: aarya@barc.gov.in

*Phone: 91-22-25599023 Fax: 91-22-25505151*

**Table S1: Variation of Structural Parameter for Eu-doped KMgF<sub>3</sub> using 3 × 3 × 3 supercell**

| System                                                               | Cell Parameter (Å) | Cell Volume (Å <sup>3</sup> ) | d <sub>Mg-F</sub> (Å) | d <sub>K-F</sub> (Å) | d <sub>Eu-F</sub> (Å) | d <sub>Li-F</sub> (Å) |
|----------------------------------------------------------------------|--------------------|-------------------------------|-----------------------|----------------------|-----------------------|-----------------------|
| KMgF <sub>3</sub>                                                    | 12.08              | 1764                          | 2.01                  | 2.85                 | --                    | --                    |
| Eu <sub>K</sub> -KMgF <sub>3</sub>                                   | 12.10              | 1772                          | 1.99-2.03             | 2.82-2.88            | 2.74                  | --                    |
| Eu <sub>K</sub> <sup>1+</sup> -KMgF <sub>3</sub>                     | 12.05              | 1749                          | 1.98-2.02             | 2.81-2.87            | 2.73                  | --                    |
| Eu <sub>K</sub> <sup>2+</sup> -KMgF <sub>3</sub>                     | 12.01              | 1733                          | 1.97-2.03             | 2.81-2.87            | 2.58                  | --                    |
| Eu <sub>Mg</sub> -KMgF <sub>3</sub>                                  | 12.13              | 1785                          | 1.88-2.04             | 2.80-2.93            | 2.26                  | --                    |
| Eu <sub>Mg</sub> <sup>1+</sup> -KMgF <sub>3</sub>                    | 12.09              | 1768                          | 1.93-2.02             | 2.72-2.97            | 2.17                  | --                    |
| Eu <sub>K</sub> +V <sub>Mg</sub> -KMgF <sub>3</sub>                  | 12.08              | 1762                          | 1.94-2.05             | 2.78-2.87            | 2.23                  | --                    |
| (Eu <sub>K</sub> +V <sub>Mg</sub> ) <sup>1+</sup> -KMgF <sub>3</sub> | 12.10              | 1774                          | 1.97-2.05             | 2.82-2.87            | 2.23                  | --                    |
| (Eu <sub>K</sub> +V <sub>Mg</sub> ) <sup>1-</sup> -KMgF <sub>3</sub> | 12.15              | 1795                          | 1.95-2.06             | 2.81-2.89            | 2.26                  | --                    |
| (Eu <sub>K</sub> +2V <sub>K</sub> )-KMgF <sub>3</sub>                | 12.04              | 1745                          | 1.96-2.05             | 2.81-3.09            | 2.56                  | --                    |
| (Eu <sub>K</sub> +2V <sub>K</sub> ) <sup>1+</sup> -KMgF <sub>3</sub> | 12.03              | 1739                          | 1.96-2.05             | 2.80-3.09            | 2.46                  | --                    |
| (Eu <sub>K</sub> +2V <sub>K</sub> ) <sup>1-</sup> -KMgF <sub>3</sub> | 12.14              | 1789                          | 2.00-2.03             | 2.83-3.04            | 2.59                  | --                    |
| (Eu <sub>Mg</sub> -V <sub>K</sub> )-KMgF <sub>3</sub>                | 12.12              | 1781                          | 1.94-2.05             | 2.83-2.93            | 2.20                  | --                    |
| (Eu <sub>Mg</sub> -V <sub>K</sub> ) <sup>1+</sup> -KMgF <sub>3</sub> | 12.11              | 1774                          | 1.94-2.05             | 2.81-2.89            | 2.19                  | --                    |
| (Eu <sub>Mg</sub> -V <sub>K</sub> ) <sup>1-</sup> -KMgF <sub>3</sub> | 12.17              | 1802                          | 1.95-2.07             | 2.81-2.82            | 2.18                  | --                    |
| Eu <sub>K</sub> -Li <sub>Mg</sub>                                    | 12.08              | 1762                          | 1.98-2.01             | 2.76-2.86            | 2.37                  | 1.96                  |

|                                                       |       |      |                      |                      |                      |              |
|-------------------------------------------------------|-------|------|----------------------|----------------------|----------------------|--------------|
|                                                       |       |      | 2.03                 | 3.02                 |                      |              |
| $(\text{Eu}_K\text{-Li}_{\text{Mg}})^{1+}$            | 12.05 | 1747 | 1.96<br>2.00<br>2.04 | 3.09<br>2.85<br>2.77 | 2.63<br>2.32         | 1.93<br>2.21 |
| $\text{Eu}_K\text{-Li}_{\text{Mg}}\text{-V}_K$        | 12.06 | 1753 | 1.97<br>2.00<br>2.03 | 2.77<br>2.87<br>2.89 | 2.48<br>2.75         | 1.95<br>2.18 |
| $(\text{Eu}_K\text{-Li}_{\text{Mg}}\text{-V}_K)^{1+}$ | 12.03 | 1741 | 1.97<br>2.00<br>2.03 | 2.77<br>2.87<br>3.10 | 2.37<br>2.46<br>2.75 | 1.96<br>2.13 |
| $(\text{Eu}_K\text{-Li}_{\text{Mg}}\text{-V}_K)^{1-}$ | 12.09 | 1768 | 1.99<br>2.04         | 2.83<br>2.86<br>3.07 | 2.38<br>2.60<br>2.74 | 1.97<br>2.19 |
| $\text{Eu}_{\text{Mg}}\text{-Li}_K$                   | 12.13 | 1785 | 1.94<br>2.02<br>2.06 | 2.85<br>2.28         | 2.17<br>2.28         | 2.10         |
| $(\text{Eu}_{\text{Mg}}\text{-Li}_K)^{1+}$            | 12.11 | 1775 | 1.94<br>2.00<br>2.05 | 2.85-<br>2.87        | 2.15-<br>2.18        | 1.95         |
| $(\text{Eu}_{\text{Mg}}\text{-Li}_K)^{1-}$            | 12.17 | 1803 | 1.95<br>2.05         | 2.82-<br>2.87        | 2.18-<br>2.35        | 2.22         |

**Table S2: Variation of Bader Charge on the Eu-Center**

| System                                                                | Bader Charge |
|-----------------------------------------------------------------------|--------------|
| KMgF <sub>3</sub>                                                     | --           |
| Eu <sub>K</sub> -KMgF <sub>3</sub>                                    | 1.66         |
| Eu <sub>K</sub> <sup>1+</sup> -KMgF <sub>3</sub>                      | 1.68         |
| Eu <sub>K</sub> <sup>2+</sup> -KMgF <sub>3</sub>                      | 2.21         |
| Eu <sub>Mg</sub> -KMgF <sub>3</sub>                                   | 1.67         |
| Eu <sub>Mg</sub> <sup>1+</sup> -KMgF <sub>3</sub>                     | 2.16         |
| Eu <sub>K</sub> +V <sub>Mg</sub> <sup>-</sup> - KMgF <sub>3</sub>     | 2.16         |
| (Eu <sub>K</sub> +V <sub>Mg</sub> ) <sup>1+</sup> - KMgF <sub>3</sub> | 2.18         |
| (Eu <sub>K</sub> +V <sub>Mg</sub> ) <sup>1-</sup> - KMgF <sub>3</sub> | 1.68         |
| (Eu <sub>K</sub> +2V <sub>K</sub> ) <sup>-</sup> - KMgF <sub>3</sub>  | 2.21         |
| (Eu <sub>K</sub> +2V <sub>K</sub> ) <sup>1+</sup> - KMgF <sub>3</sub> | 2.27         |
| (Eu <sub>K</sub> +2V <sub>K</sub> ) <sup>1-</sup> - KMgF <sub>3</sub> | 1.70         |
| (Eu <sub>Mg</sub> -V <sub>K</sub> )-KMgF <sub>3</sub>                 | 2.15         |
| (Eu <sub>Mg</sub> -V <sub>K</sub> ) <sup>1+</sup> KMgF <sub>3</sub>   | 2.27         |
| (Eu <sub>Mg</sub> -V <sub>K</sub> ) <sup>1-</sup> KMgF <sub>3</sub>   | 1.70         |
| Eu <sub>K</sub> -Li <sub>Mg</sub>                                     | 1.66         |
| (Eu <sub>K</sub> -Li <sub>Mg</sub> ) <sup>1+</sup>                    | 2.18         |
| Eu <sub>K</sub> -Li <sub>Mg</sub> -V <sub>K</sub>                     | 2.19         |
| (Eu <sub>K</sub> -Li <sub>Mg</sub> -V <sub>K</sub> ) <sup>1+</sup>    | 2.26         |
| (Eu <sub>K</sub> -Li <sub>Mg</sub> -V <sub>K</sub> ) <sup>1-</sup>    | 1.67         |
| Eu <sub>Mg</sub> -Li <sub>K</sub>                                     | 1.67         |
| (Eu <sub>Mg</sub> -Li <sub>K</sub> ) <sup>1+</sup>                    | 2.14         |
| (Eu <sub>Mg</sub> -Li <sub>K</sub> ) <sup>1-</sup>                    | 1.57         |

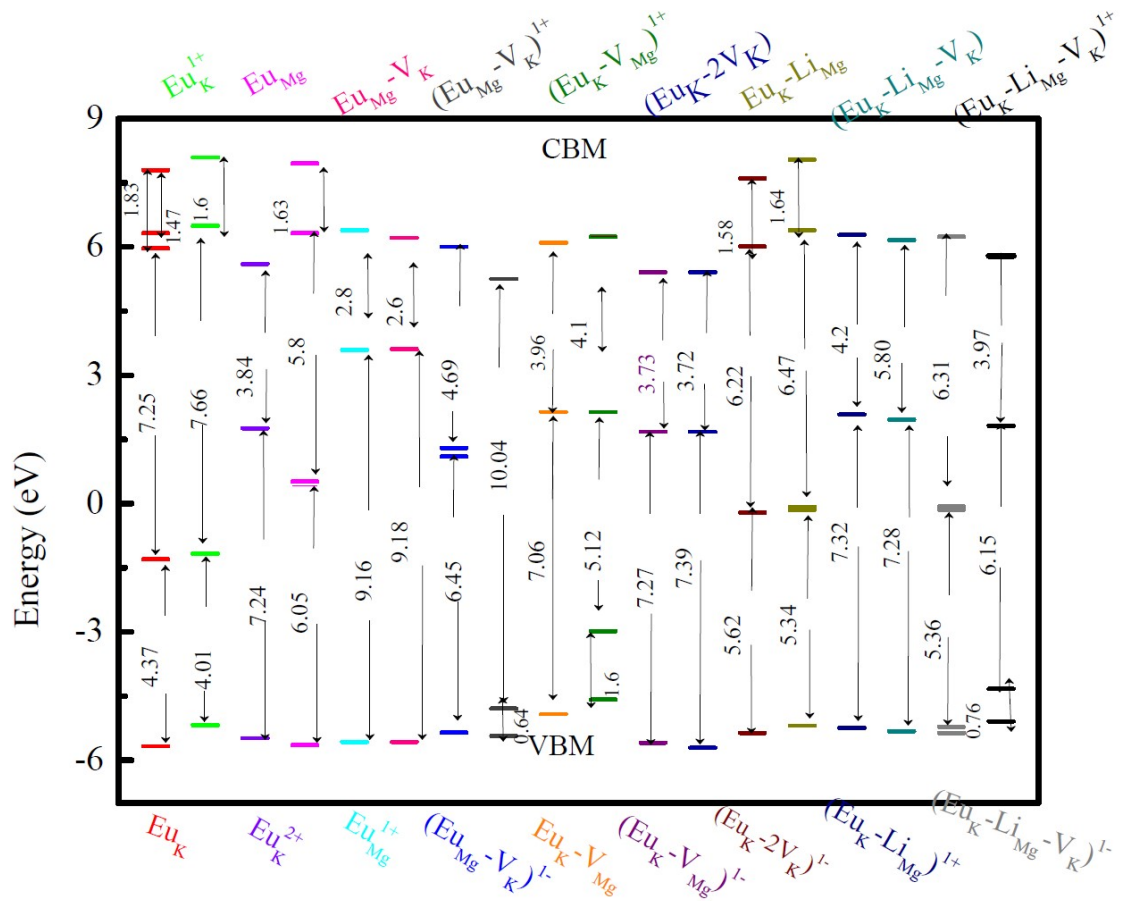

**Fig. S1: Alignment of different energy levels for Eu-doped KMgF<sub>3</sub> in the presence of different defects.**

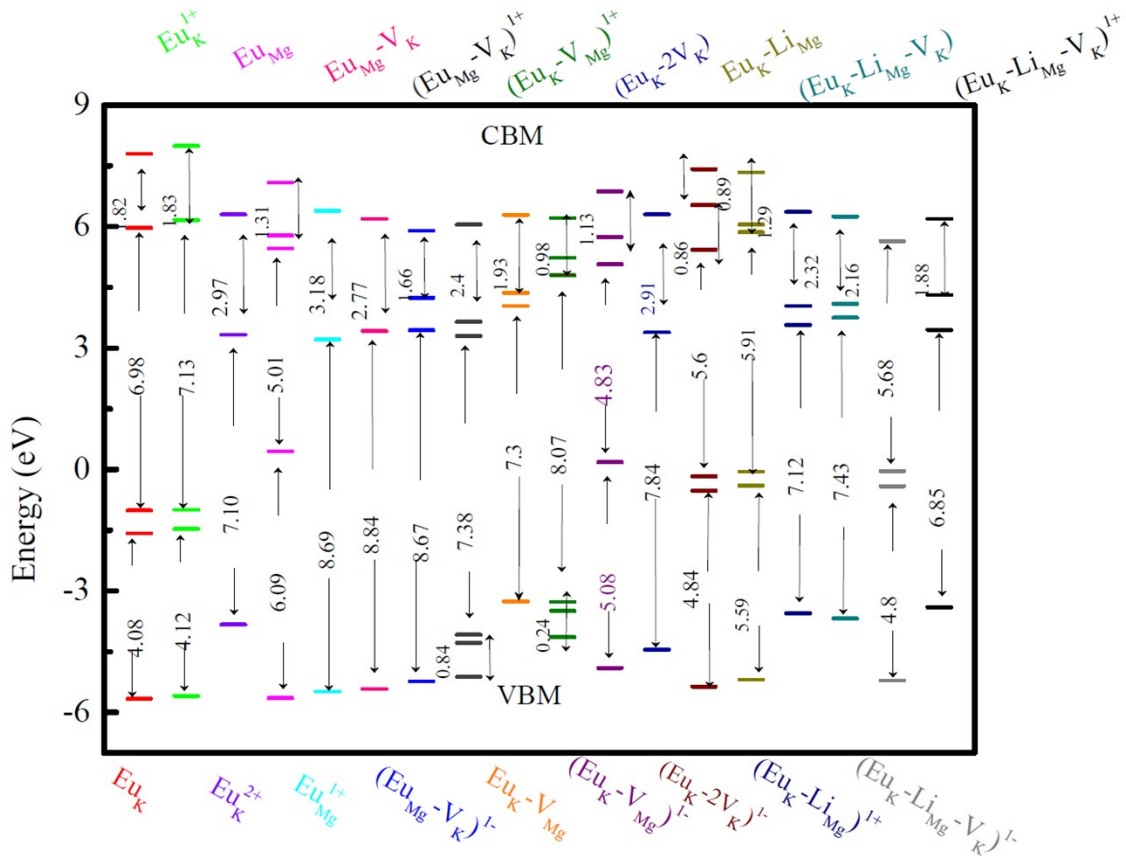

**Fig. S2: Alignment of different energy levels for Eu-doped KMgF<sub>3</sub> in the presence of different defects including spin-orbit coupling.**
